# Supplementary figures and images for: dachsous and frizzled contribute separately to planar polarity in the Drosophila ventral epidermis
Source: Oxford University Press journal article supplement (doi:10.1242/dev.063024), 2011-05-25

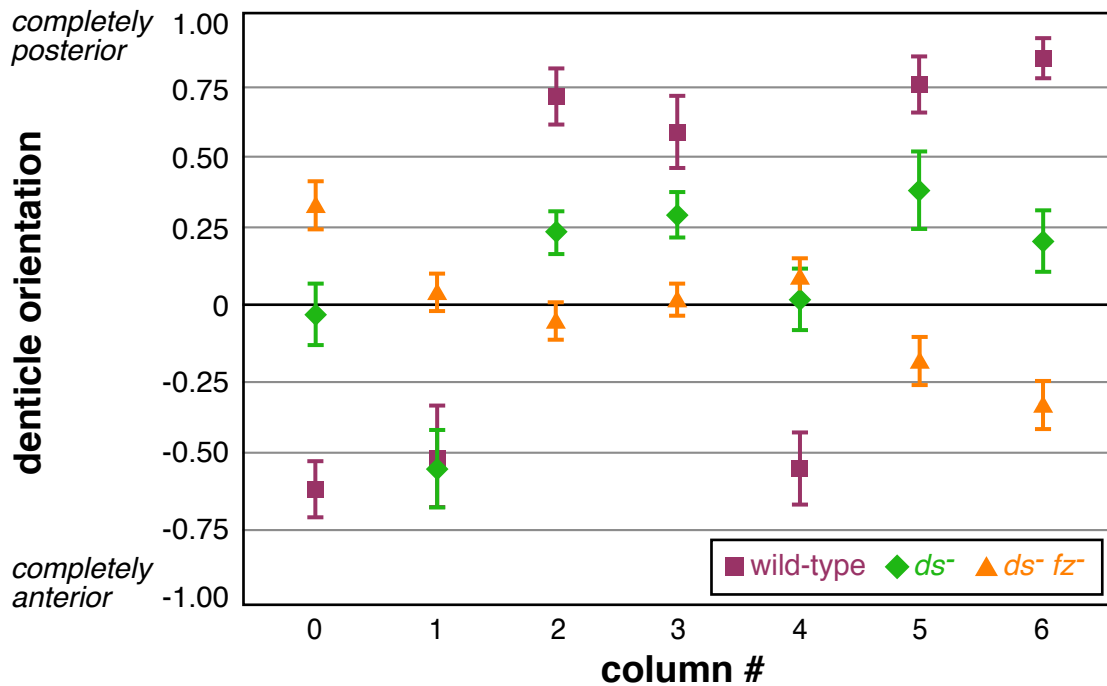

Supplement: dev063024figs1.pdf [file dev063024figs1.pdf]

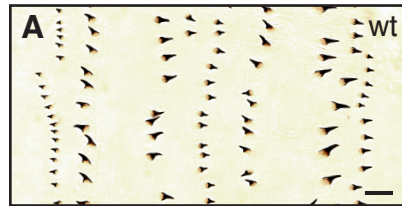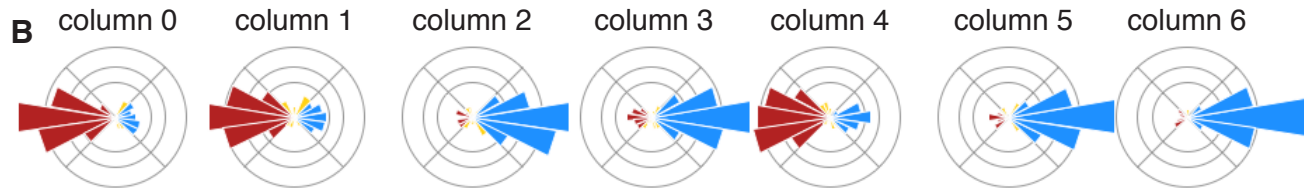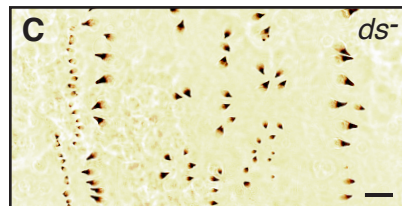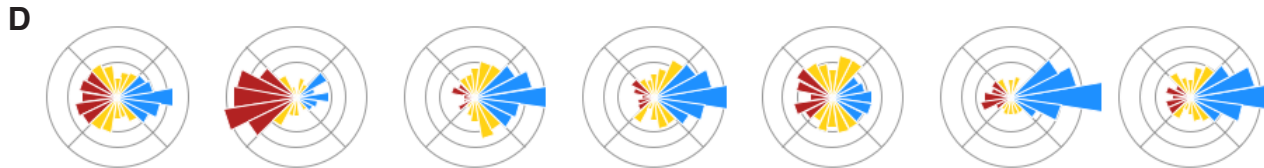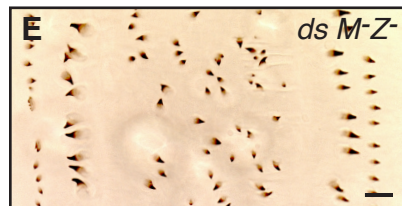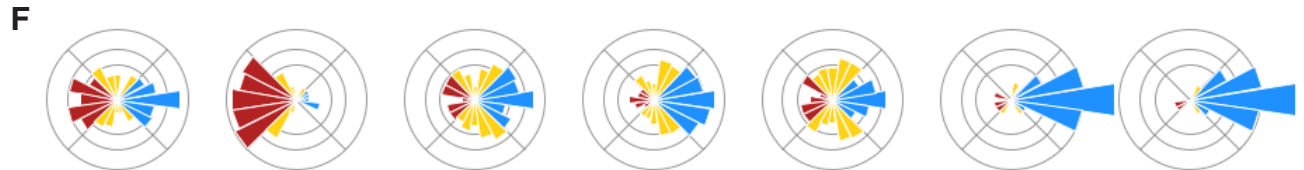

Supplement: dev063024figs2.pdf [file dev063024figs2.pdf]

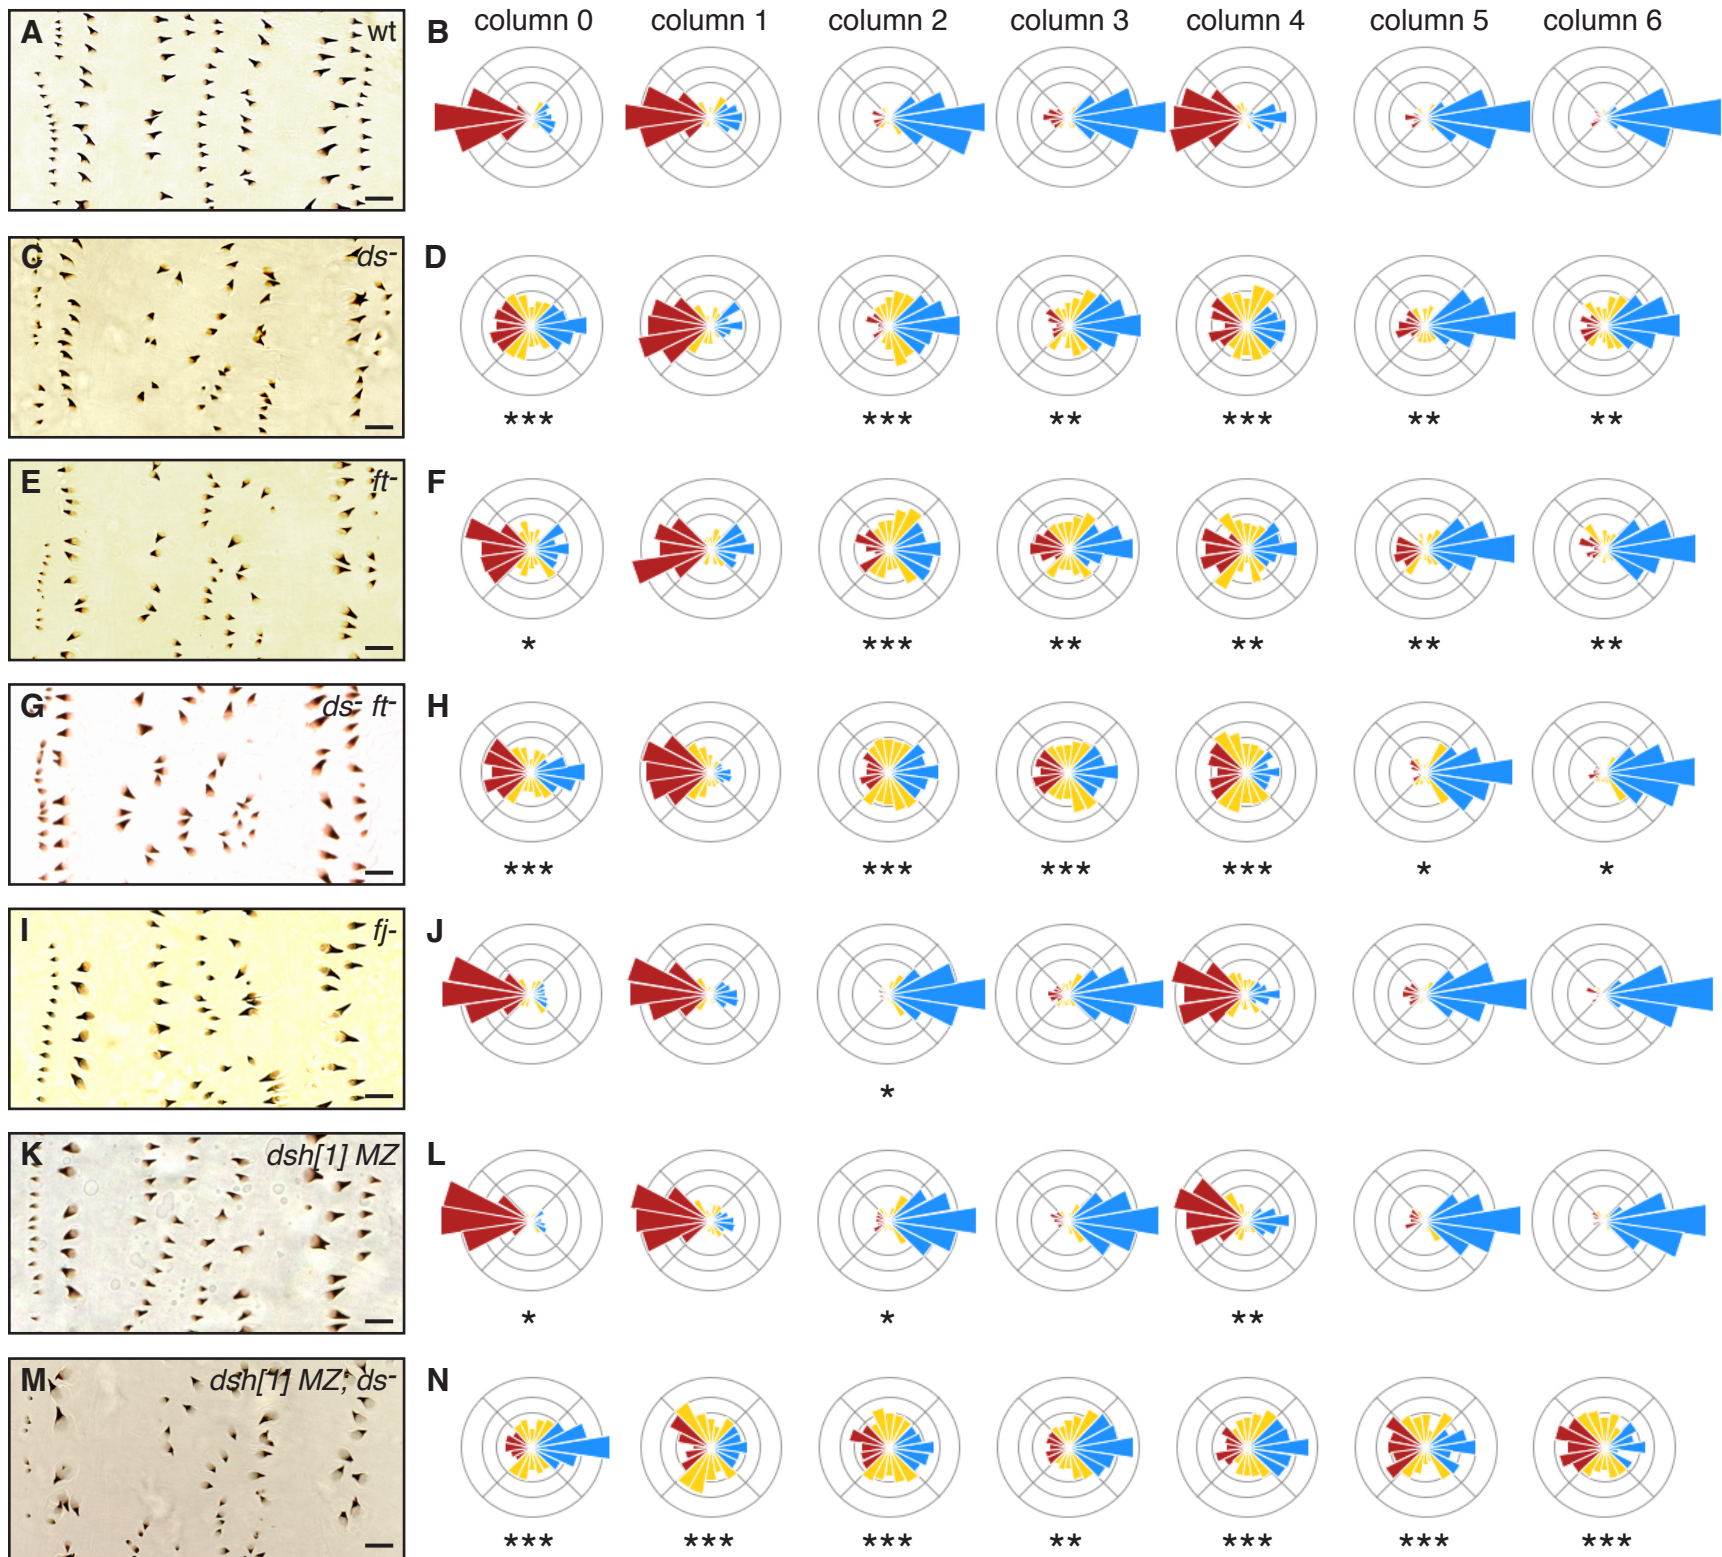

Supplement: dev063024figs3.pdf [file dev063024figs3.pdf]

control

*ds maternal- zygotic-*

3rd instar

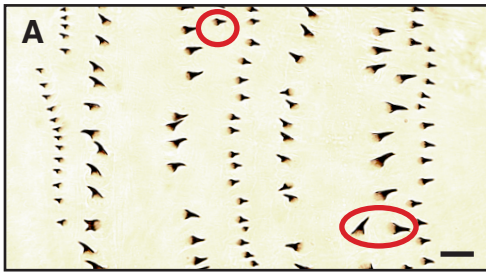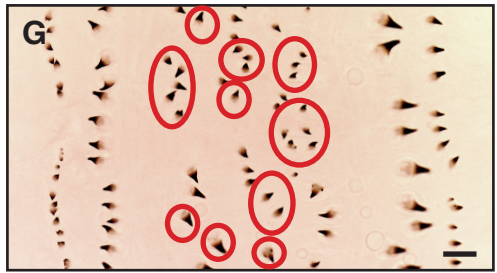

2nd instar

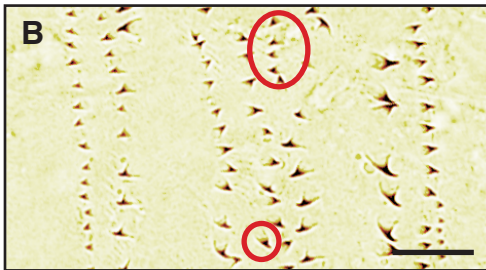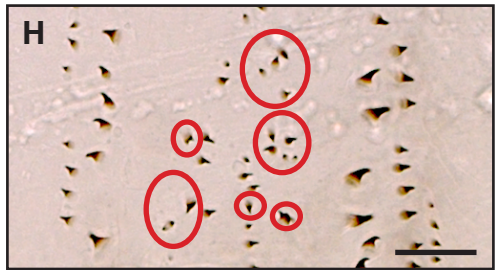

1st instar

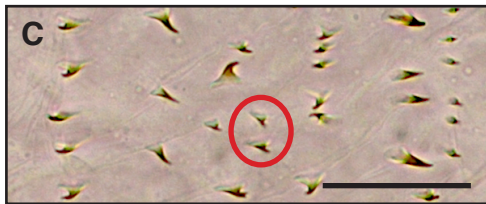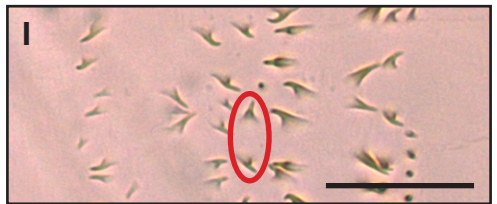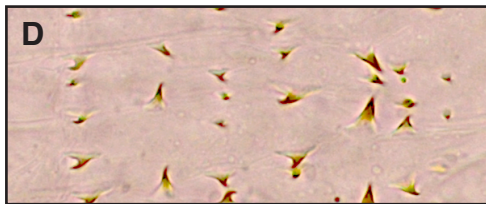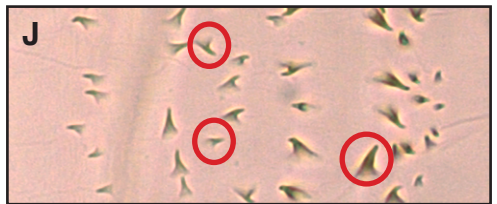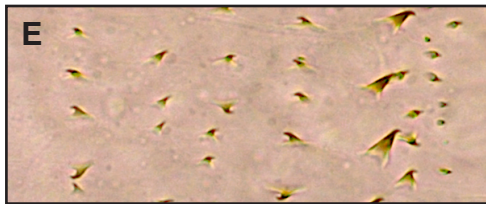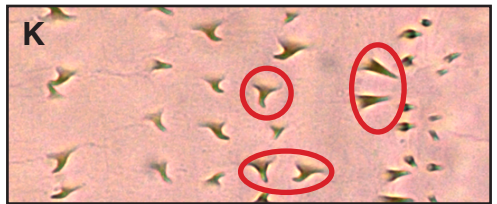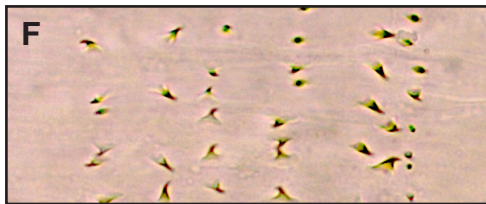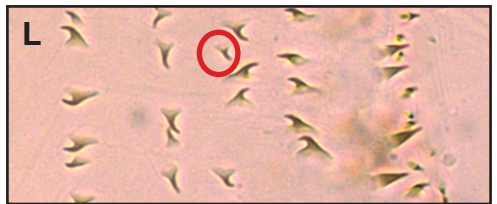

Supplement: dev063024figs4.pdf [file dev063024figs4.pdf]
